# 1 **Characterisation of the biosurfactants from phyllosphere colonising** 2 ***Pseudomonads* and their effect on plant colonisation and diesel degradation**

3

4 Oso S<sup>1</sup>, Fuchs F<sup>2</sup>, Übermuth C<sup>2</sup>, Zander L<sup>2</sup>, Daunaraviciute S<sup>2</sup>, Remus DM<sup>1,3</sup>, Stötzel I<sup>4</sup>, Wüst  
5 M<sup>4</sup>, Schreiber L<sup>2\*</sup>, Remus-Emsermann MNP<sup>1,5,6\*</sup>

6 <sup>1</sup>School of Biological Sciences, University of Canterbury, Christchurch, New Zealand;

7 <sup>2</sup>Department of Institute for Cellular and Molecular Botany (IZMB), University of Bonn, Bonn,

8 Germany; <sup>3</sup>Protein Science & Engineering, Callaghan Innovation, School of Biological

9 Sciences, University of Canterbury, Christchurch, New Zealand; <sup>4</sup>Institute of Nutritional and

10 Food Sciences (IEL), University of Bonn, Bonn, Germany; <sup>5</sup>Biomolecular Interaction Centre,

11 Christchurch, New Zealand; <sup>6</sup>Bio-Protection Research Centre, School of Biological Sciences,

12 University of Canterbury, Christchurch, New Zealand.

13 \*Both authors share correspondents

14

15 **Keywords:** Plant-microbe interactions, phyllosphere-inhabiting microbes, leaf wax, leaf

16 cuticle, aliphatics, viscosin, Massetolide A

17

18 **Running title:** Biosurfactant producing *Pseudomonads* from plant leaves

19

## 20 **Abstract**

21 Biosurfactant production is a common trait in leaf surface colonising bacteria that has been

22 associated with increased survival and movement on leaves. At the same time the ability to

23 degrade aliphatics is common in biosurfactant-producing leaf colonisers. *Pseudomonads* are

24 common leaf colonisers and have been recognised for their ability to produce biosurfactants

25 and degrade aliphatic compounds. In this study, we have investigated the role of

26 biosurfactants in four non-plant pathogenic *Pseudomonas* strains by performing a

27 series of experiments to characterise the surfactant properties, and their role during leaf

28 colonisation and diesel degradation. The produced biosurfactants were identified using

29 mass-spectrometry. Two strains produced viscosin-like biosurfactants and the other two

30 produced Massetolide A-like biosurfactants which aligned with the phylogenetic relatedness

31 between the strains. To further investigate the role of surfactant production, random Tn5

32 transposon mutagenesis was performed to generate knockout mutants. The knockout

33 mutants were compared to their respective wildtypes in their ability to colonise gnotobiotic

34 *Arabidopsis thaliana* and to degrade diesel. It was not possible to detect negative effects

35 during plant colonisation in direct competition or individual colonisation experiments. When

36 grown on diesel, knockout mutants grew significantly slower compared to their respective

37 wildtypes. By adding isolated wildtype biosurfactants it was possible to complement the

38 growth of the knockout mutants.

39

40

## 41 **Importance**

42 Many leaf colonising bacteria produce surfactants and are able to degrade aliphatic  
43 compounds, however, if surfactant production provides a competitive advantage during leaf  
44 colonisation is unclear. Furthermore, it is unclear if leaf colonisers take advantage of the  
45 aliphatic compounds that constitute the leaf cuticle and cuticular waxes. Here we test the  
46 effect of surfactant production on leaf colonisation and demonstrate that the lack of  
47 surfactant production decreases the ability to degrade aliphatic compounds. This indicates  
48 that leaf surface dwelling, surfactant producing bacteria contribute to degradation of  
49 environmental hydrocarbons and may be able to utilise leaf surface waxes. This has  
50 implications for plant-microbe interactions and future studies.

51

## 52 **Introduction**

53 The leaf cuticle is a hydrophobic barrier which consist of cutin, a polymer of very long chain  
54 aliphatics, interspersed and overlaid by very long chain monomeric aliphatics, cuticular  
55 waxes (Kolattukudy, 1980; Zeisler-Diehl et al., 2018). The cuticle reduces water loss,  
56 provides protection against UV radiation, and is the primary interface for plant  
57 microorganism and insect interactions (Riederer & Schreiber, 2001; Serrano et al., 2014;  
58 Yeats et al., 2012) . The cutin is a biopolymer which consists mainly of  $\omega$  – and midchain  
59 hydroxy and epoxy fatty acids  $C_{16}$ - $C_{18}$  as well as glycerol (Graça, 2002; Pollard et al., 2008;  
60 Wattendorff & Holloway, 1980). The cutin forms the structural backbone of the cuticle as it is  
61 known to prevent mechanical damage. The cuticular waxes are the second major  
62 component of the leaf cuticle mostly consisting of alkanes, alcohols, acids, and aldehydes of  
63 chain lengths between  $C_{16}$  -  $C_{32}$ . Cuticular waxes may also include secondary metabolites  
64 such as flavonoids, triterpenoids and phenylpropanoids (Jeffree, 2006). Cuticular waxes can  
65 be separated into two distinct waxes. The intracuticular wax within the cutin polymer is  
66 clearly distinct from the epicuticular wax which is on the outer surface of the cutin polymer  
67 (Buschhaus & Jetter, 2011; Samuels et al., 2008). These differences thus affect the physical  
68 properties of the plant surfaces. The composition of the cuticular waxes is dependent on  
69 plant species and environmental conditions (Jetter et al., 2006; Shepherd & Wynne Griffiths,  
70 2006). Wax monomers are very energy rich and a potential source of energy and carbon if  
71 they are bioavailable. However, it is still unclear if bacteria are able to utilise these aliphatic  
72 compounds constituting the cuticle of living leaves as a source of carbon and if surfactants  
73 would facilitate the utilisation.

74 Leaves are home to a manifold of bacteria and they can be covered by up to 5% bacterial  
75 biomass (Remus-Emsermann et al., 2014; Schlechter et al., 2019). Many leaf surface

76 colonising genera were previously shown to degrade hydrocarbons, e.g. *Rhodococcus* spp.,  
77 *Sphingomonas* spp., *Pantoea* spp., *Methylobacterium* spp., and Pseudomonads (Kertesz &  
78 Kawasaki, 2010; Oso et al., 2019; Pizzolante et al., 2018; Salam et al., 2015).  
79 Pseudomonads are common leaf colonisers and have many different ecological roles, e.g.  
80 many *Pseudomonas syringae* strains can be bonafide and host specific pathogens (Xin et  
81 al., 2018) while others may act as antagonists against agents of plant disease (Cabrefiga et  
82 al., 2007; Zengerer et al., 2018) or have unknown, tritagonistic (Freimoser et al., 2016),  
83 functions in the microbiota (Remus-Emsermann et al., 2016; Schmid et al., 2018).  
84 Pseudomonads have the ability to produce so-called biosurfactants in common (D'aes et al.,  
85 2010). Biosurfactants are biologically produced amphiphilic molecules consisting of a  
86 hydrophilic head group and a hydrophobic moiety.  
87 Leaf colonising Pseudomonads produce cyclic peptide biosurfactants (D'aes et al., 2010).  
88 Their ecophysiological role is not always clear, but it has been shown that Pseudomonads  
89 may gain different fitness advantages by producing surfactants including increasing survival  
90 during fluctuating humidity conditions on leaves (Burch et al., 2014) and by increasing local  
91 water availability due to the hygroscopic nature of their surfactants (Hernandez & Lindow,  
92 2019). On agar plates it has been shown that biosurfactants increase surface mobility by  
93 swarming and it has been assumed that they may serve similar functions on leaves (Lindow  
94 & Brandl, 2003).  
95 In this study, we characterised the physiological effect of biosurfactants in four different  
96 Pseudomonads that were isolated from leaves of spinach (*Pseudomonas* sp. FF1) or  
97 Romaine lettuce (*Pseudomonas* spp. FF2, FF3, and FF4) respectively. Their biosurfactants  
98 were characterised using mass spectrometry and their physical properties were analysed.  
99 Furthermore, we investigated the ecophysiological functions of the biosurfactants for the  
100 bacteria. To that end, random insertion libraries were produced and biosurfactant knockout  
101 mutants identified. The knockout mutants were characterised in a series of experiments that  
102 investigated fitness changes *in vitro* and *in planta*.

103

104

## 105 **Material and Methods**

### 106 ***Bacterial strains used in this study***

107 Bacteria used in this study were *Pseudomonas* sp. FF1 (PFF1), *Pseudomonas* sp. FF2  
108 (PFF2), *Pseudomonas* sp. FF3 (PFF3), *Pseudomonas* sp. FF4 (PFF4) (Burch et al., 2011);  
109 All Pseudomonads were kind gifts of Adrien Burch and Steven Lindow (UC Berkeley)) and  
110 *E. coli* Stellar (Lucigen). PFF1 was isolated from spinach, PFF2, PFF3, and PFF4 were  
111 isolated from Romaine lettuce. Pseudomonads were routinely grown on liquid King's B (KB,  
112 20 g proteose peptone, 1.15 g K<sub>2</sub>HPO<sub>4</sub>, 1.5 g Mg[SO<sub>4</sub>]\*7H<sub>2</sub>O. 10 g glycerol per liter, pH 7; for  
113 agar medium KBA, add 15 g agar per liter) or Lysogeny Broth (LB, 5 g yeast extract, 10 g  
114 tryptone, 10 g NaCl per liter, pH 7; for agar medium add 15 g agar per liter). *E. coli* was  
115 routinely grown on LB and LBA. For *in planta* competition experiments, spontaneous  
116 streptomycin resistant mutants of the wildtype Pseudomonads were selected (Newcombe &  
117 Hawirko, 1949). Where appropriate, the media were supplemented with kanamycin (50 µg  
118 ml<sup>-1</sup>) or streptomycin (50 µg ml<sup>-1</sup>).

119

### 120 ***16S rRNA gene sequencing***

121 To determine the phylogeny of the strains, their 16S rRNA gene was amplified from genomic  
122 DNA that was extracted using the NucleoSpin® Microbial DNA Kit (Macherey Nagel)  
123 following the manufacturer's recommendations. A PCR using KAPA2G Fast 2x Ready Mix  
124 with Dye (Kapa) was performed using the manufacturer's recommendation, 1 µL of genomic  
125 and 16S rRNA gene targeting primers SLK8-F 5'-AGAGTTTGATCATGGCTCAGAT-3' and  
126 SRK1506-R 5'-TACCTTGTTACGACTTCACCCC-3'. Resulting ~1.5 Kbp fragments were  
127 sequenced (Eurofins Genomic) and then curated and assembled using Geneious prime  
128 (Geneious). The assembled fragments were uploaded to ezbiocloud (Yoon et al., 2017) and  
129 the 30 best matches of organisms that were validly named were recovered for each of the  
130 four strains. Additional *Pseudomonas* 16S sequences and outgroup sequences were  
131 recovered from the silva database (Glöckner et al., 2017). All sequences were compiled into  
132 a fasta file and aligned and visualised using the FastME/OneClick option of ngphylogeny.fr  
133 (Lemoine et al., 2019). The resulting tree was imported into iTol, edited for publication and  
134 then exported (Letunic & Bork, 2019).

135

### 136 ***Preparation of electrocompetent Pseudomonads***

137 Electrocompetent Pseudomonads were produced as explained elsewhere (Artiguenave et  
138 al., 1997). Briefly, bacteria were grown overnight in 6 ml KB in a shaking incubator at 25 °C.  
139 Three ml of the overnight culture were then used to inoculate 100 ml KB that were incubated

140 at 25 °C in a shaking incubator until the culture reached mid-exponential growth phase  
141 OD<sub>600nm</sub> of approximately 0.6. The culture was then split in 50 ml aliquots and cooled on ice  
142 for 30 minutes. Bacteria were then harvested by centrifugation at 6000 g and 4 °C for 10  
143 minutes. The supernatant was dismissed and the aliquots were washed twice with 50 ml  
144 ice-cold sterile water. Then they were washed in 25 ml ice-cold water and the aliquots were  
145 combined again. After a final centrifugation, the cell pellet was resuspended in 250 µl sterile  
146 10% glycerol and distributed in 50 µl aliquots that were stored at -80 °C.

147

#### 148 **Random transposon mutagenesis**

149 Random knockout mutants were produced using the EZ::Tn5<sup>Tm</sup> <KAN-2> Tnp  
150 Transposome<sup>Tm</sup> kit (Epicentre) following the manufacturers recommendations. In brief, 50 µl  
151 electrocompetent Pseudomonads were thawed on ice and 1 µl Tn5-transposome and 1 µl  
152 endonuclease inhibitor were mixed with the cells. The mix was incubated for 5 minutes on  
153 ice before the cells were pipetted into a pre-chilled 0.1 cm gap electroporation cuvette. A  
154 gene pulser (Bio-Rad) was used to pulse the cells (2.5 kV, 200 Ω, 25 µF). Immediately after  
155 that, 1 ml SOC (SOB: 20 g tryptone, 5 g yeast extract, 0.5 g NaCl, 10 ml 250 mM KCl per  
156 liter, pH 7. SOC: SOB supplemented with 5 ml 2 M MgCl<sub>2</sub> and 20 ml 1 M glucose) was  
157 added and the cells were incubated for 1 hour at 30 °C and 150 rpm. Transposon insertion  
158 mutants were selected on minimal medium agar plates (15 ml glycerol, 5 g L-glutamin, 1.5 g  
159 K<sub>2</sub>HPO<sub>4</sub>, 1.15 g MgSO<sub>4</sub> × 7H<sub>2</sub>O, 15 g agar per liter, pH 7) supplemented with kanamycin.  
160 Minimal medium was used to prevent the growth of auxotrophic mutants. Transposon  
161 mutants could be detected after 2 days.

162 To determine the site of transposon integration, genomic DNA of knockout mutants was  
163 isolated using the ISOLATE II kit (Bioline). Genomic DNA was cut using KpnI (New England  
164 Biolabs) or EcoRI and ligated into similarly digested and dephosphorylated vector pUC19  
165 (New England Biolabs) using T4-ligase (New England Biolabs) following the  
166 recommendations of the manufacturer. 5 µl per ligation mix were transformed into chemical  
167 competent *E. coli* Stellar using the manufacturers recommendations. Clones harboring  
168 plasmids containing the transposon were selected on LB supplemented with kanamycin.  
169 Inserts of the plasmids were sequenced using the transposon specific primer kan2\_RP-1  
170 (5'-gcaatgtaacatcagagatttgag-3'). Sequencing results were compared to the NCBI database  
171 using NCBI BLAST restricted to the genus Pseudomonas (Altschul et al., 1990).

172

#### 173 **Screens for surfactant production**

174 To screen for surfactant production, the atomised oil assay was performed (Burch et al.,  
175 2010). To that end, agar plates containing transposon mutants were sprayed with  
176 hydrophobic dodecan using an airbrush. Bacterial colonies that produced surfactants  
177 resulted in a halo around the colony where the surfactant in the agar changes the surface  
178 angle of oil droplets on the surface. Colonies that lacked this characteristic halo were further  
179 characterised. Presumptive surfactant mutants were tested in the drop collapse assay as  
180 described previously (Oso et al., 2019). Briefly, 2  $\mu\text{l}$  of Magnatec 10W-40 oil (Castrol) were  
181 pipetted into each well of a 96-well plate lid (Corning incorporated) and were allowed to  
182 equilibrate for 2 hours to ensure that each well was evenly coated. Bacterial overnight  
183 cultures were centrifuged at  $2600 \times g$  for 10 minutes. Five  $\mu\text{L}$  of the culture supernatant was  
184 pipetted into the centre of an oil filled well. Drops that collapsed into the oil, i.e. decreased  
185 their contact angle, were positive for surfactant production while drops that remained intact  
186 and stayed on top of the oil were negative for surfactant production. All experiments were  
187 performed in at least 8 biological replicates.

188

#### 189 ***Extraction of surfactants***

190 Bacterial strains were grown as crude streaks on five separate KBA plates for 48 hours at  
191  $25^\circ\text{C}$ . Afterwards, bacterial biomass was harvested using 5 ml of sterile water per plate and  
192 the cell suspensions of all 5 plates were combined in a 50 ml centrifugation tube. 25 ml ethyl  
193 acetate was added to the suspension and the tube was vortexed for 3 minutes. The mixture  
194 was then centrifuged for 10 minutes at  $1000 \times g$  to facilitate separation of the aqueous and  
195 organic phase. The organic phase was recovered using a glass pipette and transferred to a  
196 glass vessel before the ethyl acetate was evaporated off under constant nitrogen flow. The  
197 result was resolved in ethanol and sterile filtered through a  $0.22 \mu\text{m}$  filter. The filtered  
198 solution was then dried under constant nitrogen flow and weight before it was resuspended  
199 to  $5 \mu\text{g ml}^{-1}$  in ethyl acetate.

200

#### 201 ***Mass-spectrometric analysis***

202 Mass spectrometric analysis of the biosurfactants was performed using a QTRAP 4500  
203 (Applied Biosystems, AB Sciex) triple-quadrupole mass spectrometer, operated in negative  
204 electrospray ionization (ESI) – Q1 Scan Modus. The surfactant solution with a concentration  
205 of  $5 \mu\text{g ml}^{-1}$  was injected via a syringe pump set to a flow rate of  $10 \mu\text{l min}^{-1}$  directly into the  
206 MS. The analytes were detected in negative mode within a mass over charge range of 1000  
207 – 1200 m/z.

208

209

## 210 **Plant growth and in planta experiments**

211 *Arabidopsis thaliana* was grown axenically as described previously (Miebach et al., 2020).  
212 Briefly, *Arabidopsis* seeds were sterilised in a 1.5 ml Eppendorf tube by adding 1 mL 70 %  
213 ethanol and 0.1 % Triton X-100. The seeds were vortexed and then incubated for one  
214 minute. The supernatant was removed by pipetting, followed by the addition of 1 ml 10 %  
215 bleach and 10  $\mu$ l of 0.1 % Triton X-100 for 12 minutes. After removing the bleach, the seeds  
216 were rinsed thrice with 1 ml of sterile distilled water were stratified for 48 hours at 4 °C.  
217 Stratified seeds were pipetted onto Murashige and Skoog-agar (MS-agar, 2.2 g of Murashige  
218 and Skoog medium including vitamins (Duchefa) and 10 g plant agar (Duchefa) per litre of  
219 milliQ water, pH 5.8) filled 200  $\mu$ L pipette tips that were shortened by 1 cm to allow the  
220 plant's roots to easily pass the tip. The tips were placed pointy end first into a MS-agar plate.  
221 The seeds were germinated for seven days at short day conditions (11 hours day/ 13 hours  
222 night). After the germination period, the seedling-filled tips were transferred to autoclaved  
223 Magenta™ GA-7 (bioWORLD) plant culture boxes filled with finely ground 90 g zeolite clay  
224 (Purffit Clay Litter, Vitapet) and 60 ml MS medium. Four seedlings were transferred into each  
225 Magenta box and the plants were grown for an additional three weeks at short day  
226 conditions (11 hours day/ 13 hours night, chamber set to 85% relative humidity). To prepare  
227 bacterial inoculum, bacteria were cultured on LB broth overnight. Bacteria were then  
228 harvested by 10 min centrifugation at 2600 g and washed with 1  $\times$  phosphate buffer saline  
229 (PBS, 0.2 g L<sup>-1</sup> NaCl, 1.44 g L<sup>-1</sup> Na<sub>2</sub>HPO<sub>4</sub> and 0.24 g L<sup>-1</sup> KH<sub>2</sub>PO<sub>4</sub>). Bacteria were  
230 resuspended to an OD<sub>600nm</sub> 0.5 and then serial diluted to OD<sub>600nm</sub> 0.00005. For competition  
231 experiments wildtype and surfactant knockout strains were mixed at a ratio of 1:1. 100  $\mu$ L of  
232 the mix or the monocultures were inoculated onto three week-old *Arabidopsis* using an  
233 T-180 airbrush (KKmoon).

234 Bacteria were recovered by harvesting the leaf material of individual plants, placing them in  
235 a 1.5 ml Eppendorf vial. The plants were weighed and 1 mL 1  $\times$  PBS were added. The vial  
236 was vortexed for 2 minutes and then sonicated for 5 minutes in a sonication bath  
237 (Elmasonic) before they were vortexed for another 2 minutes. The supernatant was serial  
238 diluted and CFU of wildtype and surfactant mutants were determined by growing the strains  
239 on LB agar containing appropriate antibiotics to select for either the spontaneous  
240 streptomycin resistant wildtype or the kanamycin resistant mutants.

241

## 242 **Diesel utilisation assay**

243 To measure the ability of wildtype and surfactant knockout mutants to grow on diesel as the  
244 sole source of carbon, Bushnell-Haas broth (0.2 g L<sup>-1</sup> MgSO<sub>4</sub>, 0.02 g L<sup>-1</sup> CaCl<sub>2</sub>, 1.0 g L<sup>-1</sup>

245  $\text{KH}_2\text{PO}_4$ ,  $1.0 \text{ g L}^{-1}$   $\text{K}_2\text{HPO}_4$ ,  $1.0 \text{ g L}^{-1}$   $\text{NH}_4\text{NO}_3$  and  $0.05 \text{ g L}^{-1}$   $\text{FeCl}_3$ , pH 7.2), was  
246 supplemented with 1% diesel (commercial diesel, locally sourced) (Oso et al., 2019).  
247 Bushnell-Haas broth without additional carbon source was used as a negative control. In  
248 control experiments, to complement surfactant knockout mutants, between 0.23-0.265 mg  
249  $\text{mL}^{-1}$  of isolated WT surfactants or  $0.1 \text{ mg mL}^{-1}$  Tween-20 were supplemented. Bacteria were  
250 grown overnight in LB, diluted  $100 \times$  using Bushnell-Haas broth without carbon source. The  
251 diluted bacterial suspensions were inoculated into 50 mL broth cultures in 250 mL  
252 Erlenmeyer flasks. Cultures were incubated at  $30^\circ\text{C}$  and 200 rounds per minutes for up to 17  
253 days. Cell density was regularly measured by determining the optical density at 600 nm  
254 using a spectrophotometer (Biochrom WPA CO8000, Biowave). All experiments were  
255 performed in three biological replicates.  
256



## 257 Results

### 258 *Phylogenetic placement of Pseudomonas sp. FF1, FF2, FF3 and FF4*

259 Analysis of the 16S rRNA genes of all four isolates revealed that they are all members of the  
260 genus *Pseudomonas* and members of the *Pseudomonas fluorescens* lineage and subgroup  
261 (Peix et al., 2018). PFF1 clusters closely with *Pseudomonas orientalis*, PFF2 clusters closely  
262 with *Pseudomonas extremaustralis*, while PFF3 and PFF4 cluster closely with *Pseudomonas*  
263 *paralactis* (Figure 1). PFF1 and PFF2 are closer related to each other than to PFF3 and  
264 PFF4. PFF3 and PFF4 are closely related.

265

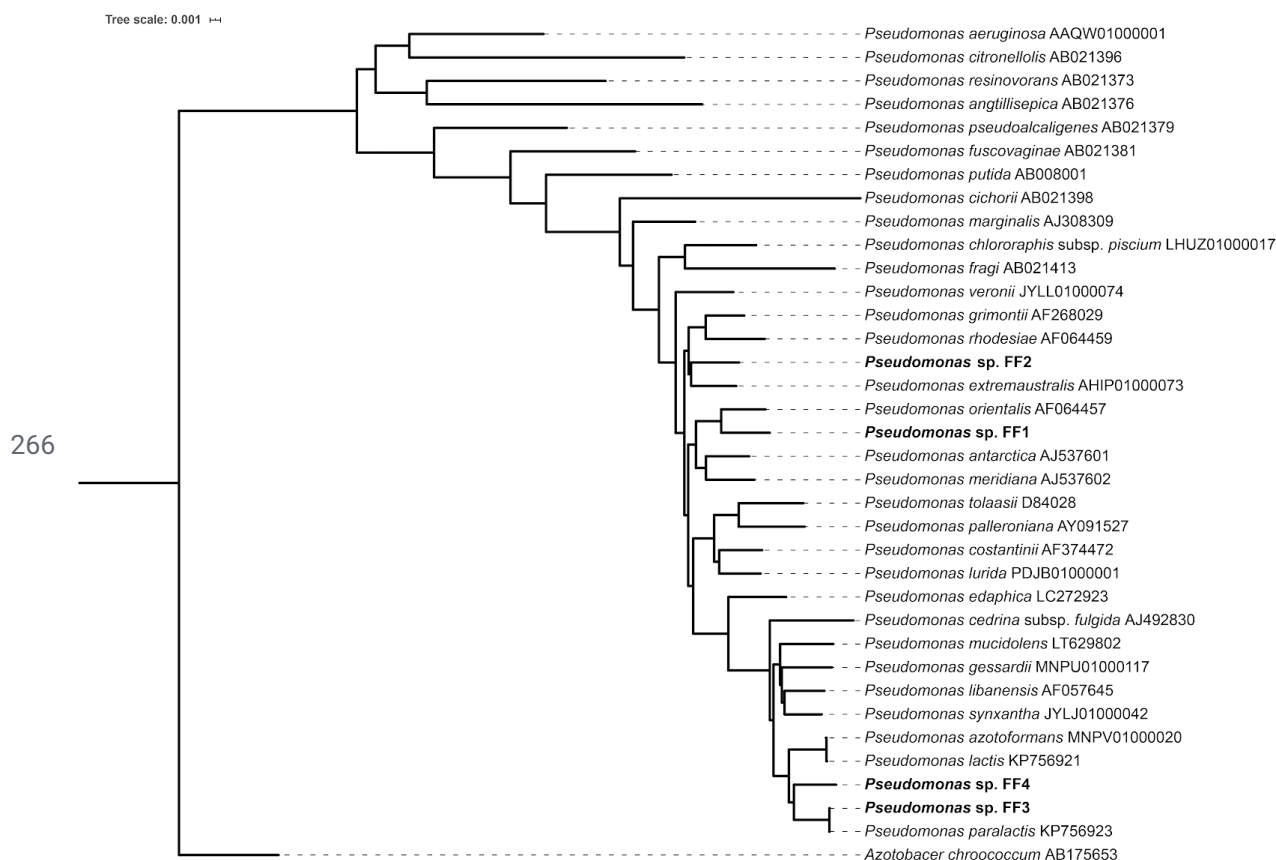

267 **Figure 1. Phylogenetic placement of the four isolated Pseudomonads.** The newly sequenced  
268 isolates are highlighted in bold. NCBI accession numbers of the respective sequences are noted  
269 behind the species names. *Azotobacter chroococcum* was used as an outgroup.

270

### 271 Surfactant production of tested Pseudomonads

272 All four wildtype Pseudomonads were tested for their production of surfactants on agar  
273 plates using the atomised oil assay (Burch et al., 2010; Oso et al., 2019). All four strains  
274 produced clear halos where the reflection of the oil to light changed indicating production of  
275 surfactants (Figure 2A-D). Similarly, the positive control Tween-20 showed a halo (Figure  
276 2E), while the negative control, *E. coli* Dh5 $\alpha$ , was lacking a halo (Figure 2F). The drop  
277 collapse assay was used as a secondary test for surfactant production. All tested wildtype

278 culture supernatants collapsed into the engine oil (Figure 2G-J). The collapse is due to a  
279 change in surface tension of the supernatant.

280

281

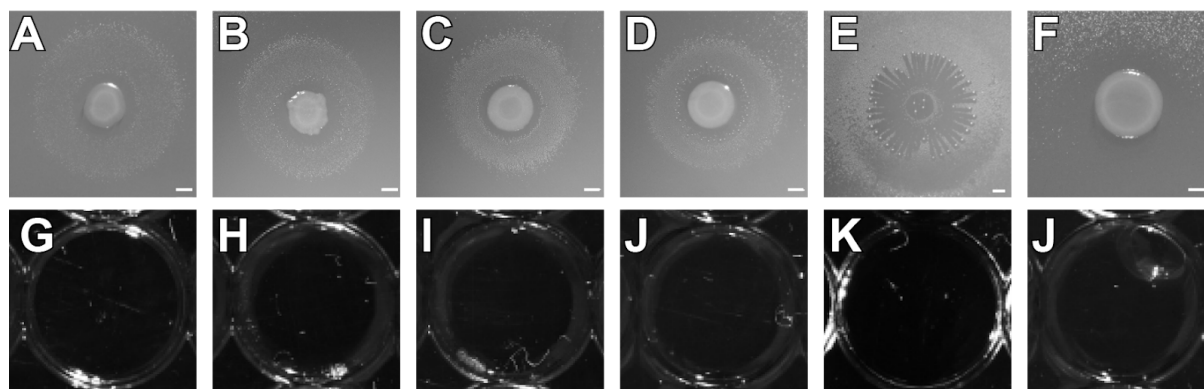

282 **Figure 2. A-F) Atomised oil assays to demonstrate the production of surfactants. A-D)** wildtype  
283 colonies of *PFF1*, *PFF2*, *PFF3*, and *PFF4*, respectively, exhibiting a halo indicative for surfactant  
284 production. **E)** Tween-20 **F)** *E. coli* Dh5α **G-L) Drop collapse assays to demonstrate the**  
285 **production of surfactants.** Culture supernatants of wildtype *PFF1*, *PFF2*, *PFF3*, and *PFF4*,  
286 respectively, collapsed into oil indicative for surfactant production. **K)** collapsed drop containing  
287 Tween-20. **L)** Non-collapsed drop of *E. coli* culture supernatant.

288

### 289 Mass spectrometric analysis surfactants

290 The analysis of surfactants harvested from the *Pseudomonads* using LC-MS with ESI in  
291 negative mode revealed that *PFF1* and *PFF2* produced the same compounds with a  
292 characteristic main peak at  $m/z=1124.59$ , which can be attributed to the deprotonated  
293 molecular ion  $[M-H]^-$ . The analogous pattern for the protonated molecular ion  $[M+H]^+$  has  
294 been previously described for the cyclic lipopeptide viscosin when using ESI in positive  
295 mode for detection (de Bruijn et al., 2008; Laycock et al., 1991). Similarly, *PFF3* and *PFF4*  
296 share the same characteristic main peak at  $m/z=1138.60$ , the analogous pattern has  
297 previously been described for the cyclic lipopeptide massetolide A (de Bruijn et al., 2008).

298

299

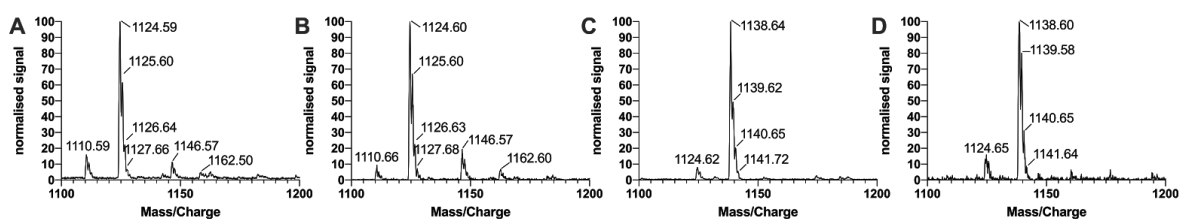

300 **Figure 3 A-D) MS/MS spectra of extracted surfactants of PFF1, PFF2, PFF3, and PFF4**  
301 **respectively. PFF1 and PFF2 both produce viscosin, PFF3 and PFF4 both produce massetolide A.**  
302 **Spectra were normalised against the maximal intensity.**

303

304

305

### 306 **Random Tn5 mutagenesis and mutant characterisation**

307 The surfactants producing wildtypes were subjected to random insertion mutagenesis using  
308 the EZ-Tn5 transposon system. The screen resulted in a transposon mutant library with  
309 several hundred transposon mutants for each of the four isolates. Each of the mutant  
310 libraries was screened with the atomised oil assay for lack of surfactant production mutants.  
311 Mutants lacking surfactant production were identified and one mutant for each isolate was  
312 selected for further characterisation (Figure 4A-D). The drop collapse assay was conducted  
313 and confirmed the results of the atomised oil assay (Figure 4E-H). The insertion site of each  
314 mutant was determined by digesting the genomic DNA of the mutants and cloning it into  
315 pUC19 before selecting for kanamycin resistance encoded in the transposon (Supplemental  
316 Table 1).

317 The investigated *PFF1* mutant carried an insertion in a gene with 97% similarity to a  
318 non-ribosomal peptide synthetase in *P. orientalis* F9 (Genbank: BOP93\_14875) (Zengerer et  
319 al., 2018) which has an 80% peptide similarity to the *viscB* gene of *P. fluorescens* SBW25  
320 (UniProtKB ID: C3K9G2) (De Bruijn et al., 2007; Silby et al., 2009). The investigated *PFF2*  
321 mutant carried an insertion in a gene with a 86% similarity to the *viscB* gene (Genbank:  
322 CAY48788.1) of *P. fluorescens* SBW25, respectively. Therefore, they are designated  
323 *PFF1::ezTn5-viscB* and *PFF2::ezTn5-viscB*, respectively. The *viscB* gene encodes for a  
324 non-ribosomal peptide synthetase that, in conjunction with *viscA* and *viscC*, produces the  
325 cyclic lipopeptide biosurfactant viscosin (De Bruijn et al., 2007). The *PFF3* Tn5 transposon  
326 mutant carried an insertion in a gene with 99% similarity to the *massB* gene in  
327 *Pseudomonas fluorescens* SS101 (Genbank: ABH06368.2). The *PFF4* Tn5 transposon  
328 mutant carried an insertion in a gene with 95% similarity to the *massB* gene in  
329 *Pseudomonas fluorescens* SS101 (de Bruijn et al., 2008). The *massB* gene is part of the  
330 massetolide A synthesis gene cluster. Therefore the mutants were designated  
331 *PFF3::ezTn5-massB* and *PFF4::ezTn5-massB*.

332

333

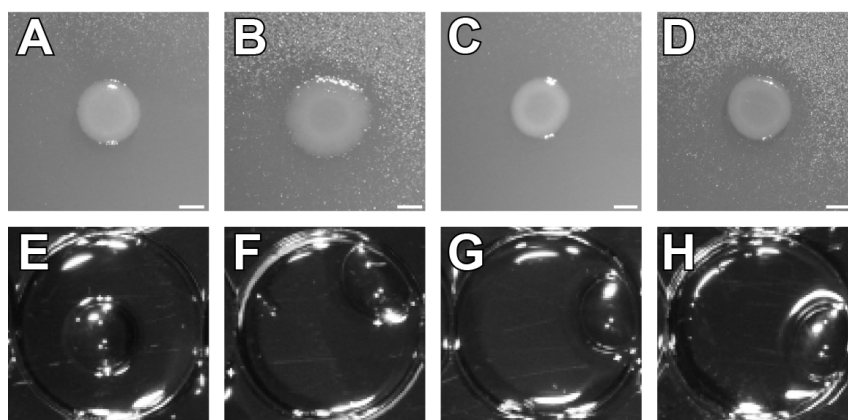

334

335 **Figure 4. A-D) Atomised oil assay to demonstrate the production of surfactants.**  
336 Tn5-transposon insertion mutant colonies *PFF1::ezTn5-visB*, *PFF2::ezTn5-visB*,  
337 *PFF3::ezTn5-massB*, and *PFF4::ezTn5-massB*, respectively, lacking a halo indicative for surfactant  
338 production. **E-H) drop collapse assays to demonstrate the production of surfactants.** Culture  
339 supernatants of Tn5-transposon insertion mutant *PFF1::ezTn5-visB*, *PFF2::ezTn5-visB*,  
340 *PFF3::ezTn5-massB*, and *PFF4::ezTn5-massB*, respectively, showing a beaded bubble swimming on  
341 top of oil, indicative for the lack of surfactants.

342

343 After extracting agar plates to recover surfactants for the analysis using mass spectrometry,  
344 no surfactants could be detected (Figure 5 A-D).

345 The effect of the transposon insertions and the lack of surfactant production was tested in  
346 shaking liquid cultures in two different conditions, either KB complex medium (Supplemental  
347 Figure 1A), or M9 minimal medium supplemented with glucose as the sole source of carbon  
348 (Supplemental Figure 1B). None of the tested insertion mutants exhibited significantly  
349 changed doubling times under the two tested conditions.

350

351

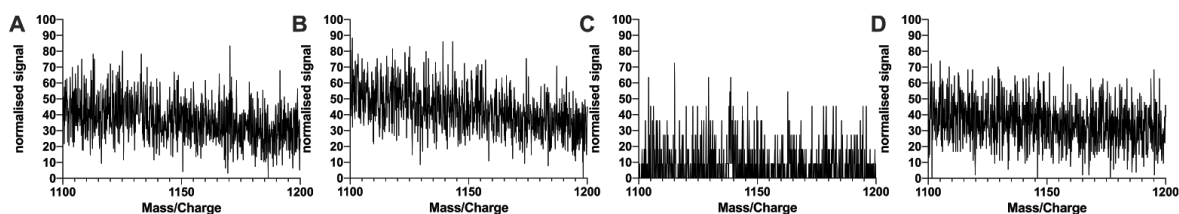

352

353 **Figure 5 A-D) Knockout mutants show no sign of surfactant production - MS/MS spectra of**  
354 **extracts of *PFF1::ezTn5-viscB*, *PFF2::ezTn5-viscB*, *PFF3::ezTn5-massB*, and *PFF4::ezTn5-massB*,**  
355 **respectively. None of the random knockout mutants produced detectable surfactant peaks at the**  
356 **respective wildtype m/z values. Spectra were normalised against the maximal intensity.**

357

358

359

### 360 Growth on diesel oil as sole carbon source

361 To investigate if the lack of surfactant production could impact the ability of the  
362 *Pseudomonad* strains to degrade alkanes, the different wildtypes and transposon mutants  
363 were grown on Bushnell-Haas broth with diesel as the sole carbon source. This experiment  
364 revealed that all surfactant mutants, even though they were still able to grow on diesel, had a  
365 reduced growth rate, and a reduced final optical density after up to 21 days of growth (Figure  
366 6). No growth could be observed on Bushnell-Haas broth without carbon source for either  
367 the wildtype or the surfactant mutants (data not shown). In general, the growth on diesel oil  
368 was slower compared to growth on complex medium or minimal medium supplemented with  
369 glucose as sole carbon source and better described by a linear function than an exponential  
370 growth function. By supplementing knockout mutants growing on diesel with biosurfactants  
371 harvested from respective wildtype strains or Tween-20 growth on diesel could be  
372 complemented in parts or completely compared to the wildtype. Knockout mutants could not  
373 grow on provided surfactants to a degree that explains the increased growth on diesel  
374 (Supplemental figure 2).

375

376

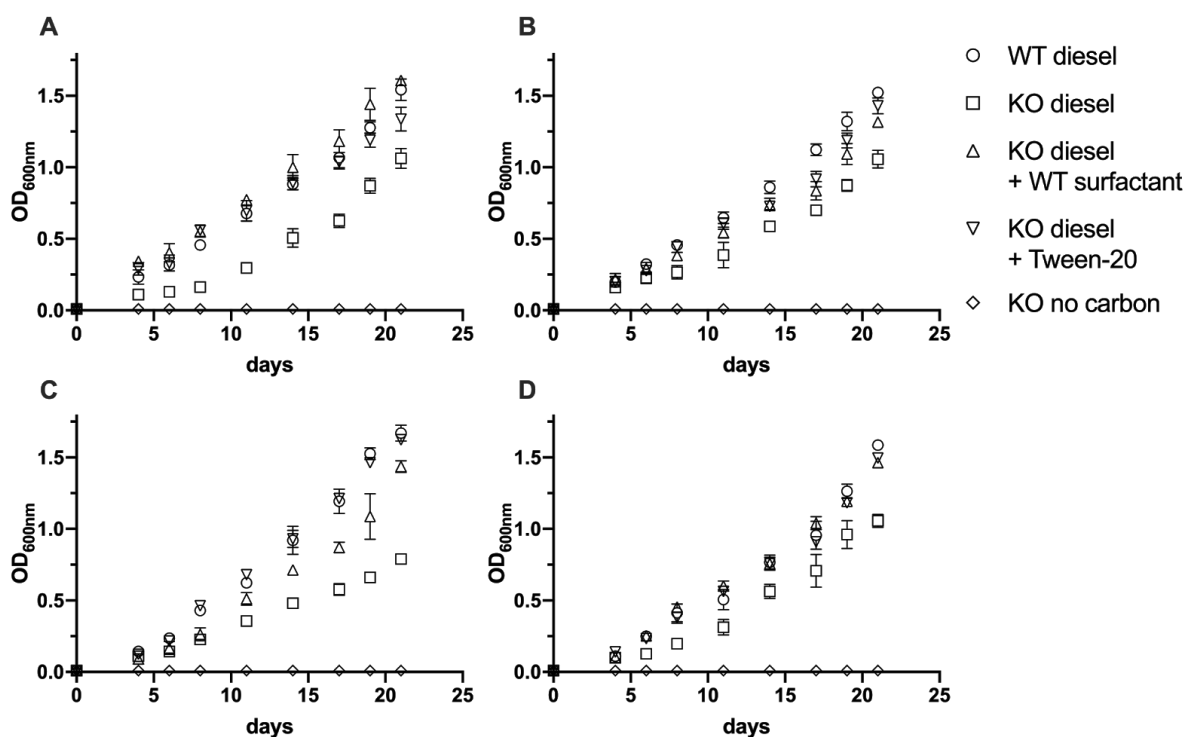

377 **Figure 6. Utilisation of diesel by biosurfactant knockout mutants and wildtypes.** A) PFF1, B)  
378 PFF2, C) PFF3, D) PFF4. Each wildtype and knockout mutant was grown in Bushnell-Haas broth  
379 supplemented with diesel as the sole source of carbon (circle and square, respectively). Knockout  
380 mutants were complemented with either wildtype surfactant (triangle), Tween-20 (inverted triangle) or  
381 were incubated with no additional carbon source (diamond). Error bars depict the standard deviation  
382 of the mean.

383

### 384 **Fitness in planta**

385 To investigate changes in the ability of the transposon mutants to colonise leaf surfaces, the  
386 mutants were co-inoculated with the respective wildtypes by airbrushing. Whole  
387 above-ground plant material was sampled daily for six days and colony forming units of  
388 wildtype and transposon mutants were determined (Figure 7). The initial bacterial densities  
389 were similar between wildtype and knockout mutants. wildtypes (PFF1, PFF2, PFF3 and  
390 PFF4) and corresponding mutants (PFF1::ezTn5-viscB, PFF2::ezTn5-viscB,  
391 PFF3::ezTn5-massB and PFF4::ezTn5-massB) colonised *Arabidopsis* at similar rates. PFF1,  
392 PFF2 and their mutants reached approximately  $10^7$  CFU per gram of plant weight, whereas  
393 PFF3, PFF4 and their mutants reached approximately  $10^6$  CFU per gram of plant weight.  
394 Thus, no differences between the plant colonisation of wildtype and mutants were found.  
395 Furthermore, growth in planta of all strains was tested individually, no significant differences  
396 in plant colonisation could be determined (Supplemental figure 3).

397

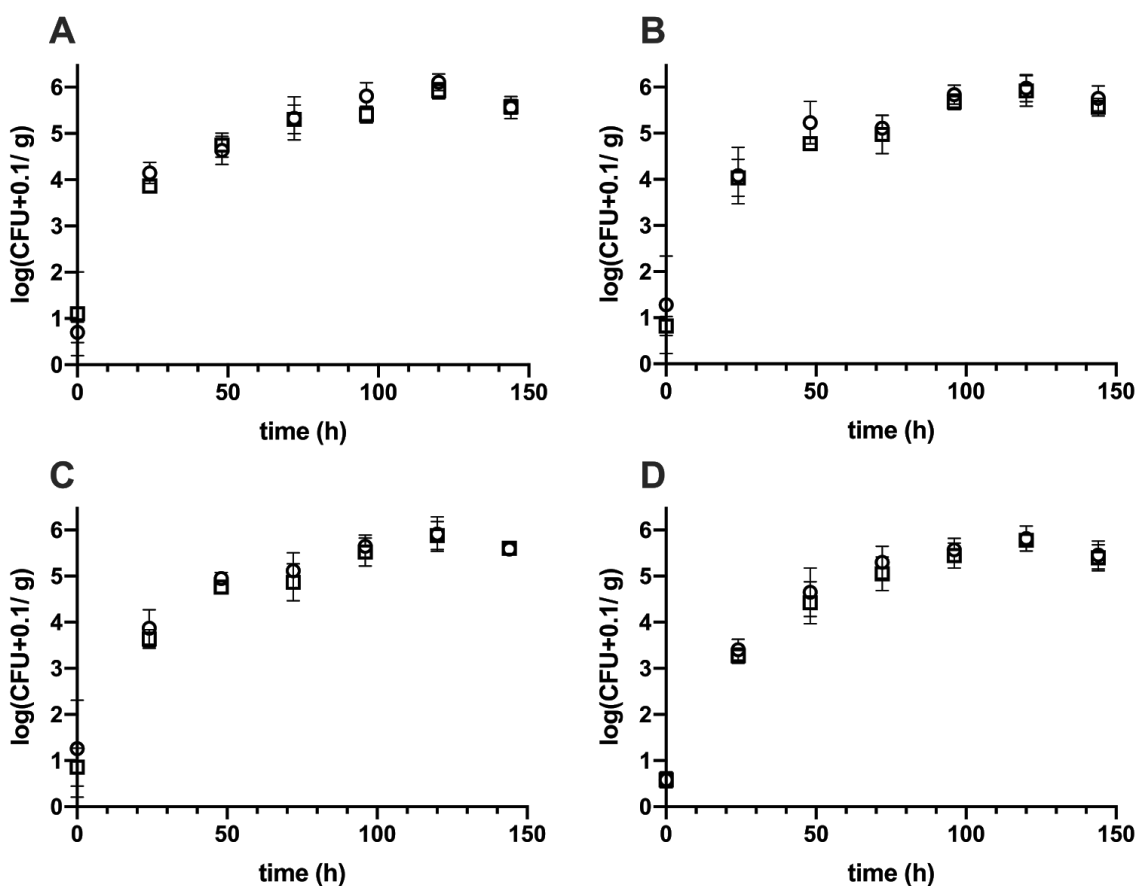

398 **Figure 7. In planta competition of wildtypes (open circles) and mutants (open squares). A)**  
399 **PFF1 vs. PFF1::ezTn5-viscB, B) PFF2 vs. PFF2::ezTn5-viscB, C) PFF3 vs. PFF3::ezTn5-massB, D)**  
400 **PFF4 vs. PFF4::ezTn5-massB. wildtypes are depicted by circles, knockout mutants by squares. Error**  
401 **bars depict the standard deviation of the mean.**

402

### 403 **Discussion**

404 All four *Pseudomonads* isolated from either spinach or romaine lettuce leaf material (Burch  
405 et al., 2016) belong to the fluorescent *Pseudomonads* (Gomila et al., 2015). *PFF1* and *PFF2*  
406 are phylogenetically more closely related to each other than to *PFF3* and *PFF4*. *PFF3* and  
407 *PFF4* are very closely related. All four strains are produced surfactants on agar plates and in  
408 liquid culture as shown by the atomised oil assay and the drop collapse assay. As the ability  
409 to produce surfactants is widely distributed in the genus *Pseudomonas*, this result was not  
410 surprising (Geudens & Martins, 2018; Nybroe & Sørensen, 2004). The relatedness of the  
411 strains is also reflected in the surfactants that each of the strains is producing: *PFF1* and  
412 *PFF2* produce the viscosin-like surfactants, while *PFF3* and *PFF4* are produced massetolide  
413 A-like surfactants. The production of viscosin and massetolide A by *Pseudomonads* has  
414 been demonstrated previously (de Bruijn et al., 2008). Both viscosin and massetolide A are  
415 the product of nonribosomal peptide synthetase genes. Viscosin production depends on a  
416 gene cluster encompassing the three genes *viscA*, *viscB*, and *viscC* and which spans  
417 approximately 32 kb (De Bruijn et al., 2007). Massetolide A production also depends on a  
418 gene cluster which encompasses the three genes *massA*, *massB* and *massC* and spans  
419 approximately 30 kb (de Bruijn et al., 2008).

420 To further investigate the ecological function of the surfactants in the leaf colonising  
421 *Pseudomonads*, random Tn5 transposon insertion mutants were produced and further  
422 characterised. The screen yielded complete loss of surfactant production mutants for every  
423 strain, indicating that each strain only encodes for one surfactant that is active during the  
424 selection conditions. The insertion sites were mapped to genes that matched previously  
425 characterised non-ribosomal peptide synthase clusters responsible for surfactant production,  
426 and which matched the surfactants that were identified using mass-spectrometry. *PFF1* and  
427 *PFF2* knockout mutants were mapped to *viscB* gene homologues, and *PFF3* and *PFF4*  
428 knockout to *massB* gene homologues (De Bruijn et al., 2007; de Bruijn et al., 2008).

429 The assumption that only one surfactant is produced by each strain was corroborated by a  
430 sequence of experiments during which the surfactant mutants consistently failed to produce  
431 signs of surfactant production independent of their growth conditions. The surfactant mutants  
432 failed to produce halos in the atomised oil assay, and the culture supernatant did not  
433 collapse into motor oil in the drop collapse assay. Mass spectrometric analysis of the  
434 knockout mutants showed that the production of surfactants was completely abolished and  
435 no detectable peak pattern was found after the surfactant extraction procedure (Figure 5).

436 Despite the loss of surfactant production and the additional burden of expressing the  
437 kanamycin resistance gene from the Tn5 transposon, the insertions had no detectable  
438 fitness effects in either complex KB medium or minimal M9 medium supplemented with  
439 glucose. In shaking liquid cultures, surfactants did not provide critical functions for growth  
440 (Supplemental figure 1). We hypothesise that surfactants may enable bacteria to utilise parts  
441 of the plant cuticle as a source for carbon. Even though it was not possible to show that  
442 *Pseudomonads* and their respective mutants had differential abilities to utilise hydrocarbon  
443 components from isolated cuticles (data not shown), a clear difference in the ability of  
444 wildtype and mutant to utilise diesel for growth was demonstrated (Figure 6). Even though  
445 growth was not completely abolished, it was markedly reduced. This could also explain why  
446 growth on isolated cuticles did not yield conclusive results and differences between wildtype  
447 and knockout mutant. Due to the size of the non-ribosomal peptide synthetase genes, it was  
448 not possible to construct rescue mutants. However, we attempted to complement the  
449 reduced ability of the knockout mutants to degrade diesel oil by adding harvested wildtype  
450 surfactant or Tween-20 to growing cultures. Indeed, both surfactants were able to  
451 complement the growth phenotype either in parts or completely, evidencing that the lack of  
452 surfactants was the causal reason for reduced growth. Despite the chain length differences  
453 between the diesel (Wante & Leung, 2018) and the alkane monomers in waxes of leaf  
454 cuticles (Zeisler-Diehl et al., 2018), the chemistry of both aliphatic mixtures contain similar  
455 monomers. It is thus not unthinkable that, under nutrient limiting conditions, the  
456 *Pseudomonas* strains tested here are able to utilise aliphatic components of leaf cuticles in a  
457 surfactant-dependent manner. However, we failed to provide a final proof of this relationship.  
458 To investigate the role of the surfactants during plant colonisation we inoculated axenically  
459 grown *Arabidopsis* with mixtures of wildtype and knockout mutants or with individual strains.  
460 During co-inoculation with their respective wildtypes onto axenic *Arabidopsis*, no fitness  
461 disadvantages for the knockout mutants were detected. This might be a consequence of the  
462 surfactant acting as a public good that increases the fitness of wildtype and co-inoculated  
463 mutants alike (Lyons & Kolter, 2017). However, single strain inoculations also did not result  
464 in a diminished ability of the knockout mutants to colonise *Arabidopsis*. This is in contrast to  
465 previous experiments that demonstrated that surfactants do indeed have a positive effect on  
466 plant colonisation (Burch et al., 2014). It is noteworthy that the experimental setup used in  
467 our study was markedly different including a different plant host as well as incubation  
468 conditions under constant relative humidities. While previously it was shown that fluctuating  
469 humidities are a prerequisite to result in a fitness advantage. Therefore, it might still be



470 possible the surfactants in the here-tested strains will impact plant colonisation for example  
471 under fluctuating relative humidities.

472

### 473 **Conclusion**

474 The experiments reported here demonstrated that the biosurfactants produced by four  
475 different leaf colonising *Pseudomonas* impacted on their ability to degrade aliphatic  
476 compounds. However, the ability to produce biosurfactants had no measurable impact on the  
477 ability of the strains to colonise axenic *Arabidopsis* leaves in competition or after individual  
478 strain inoculations. We gathered additional evidence that the bacteria may utilise aliphatic  
479 compounds originating from leaf cuticles but failed to conclusively demonstrate a relationship  
480 between surfactant production and leaf colonisation ability. Future studies will have to be  
481 performed to address this hypothesis.

482

### 483 **Acknowledgements**

484 We thank Adrien Burch and Steven Lindow, UC Berkeley, for the kind gift of the  
485 *Pseudomonas* strains. We thank Paula Jameson for critically reading the manuscript and  
486 Thomas Evans for technical support.

487

## 488 **References**

- 489 Altschul, S. F., Gish, W., Miller, W., Myers, E. W., & Lipman, D. J. (1990). Basic local  
490 alignment search tool. *Journal of Molecular Biology*, 215(3), 403–410.
- 491 Artiguenave, F., Vilaginès, R., & Danglot, C. (1997). High-efficiency transposon mutagenesis  
492 by electroporation of a *Pseudomonas fluorescens* strain. *FEMS Microbiology Letters*,  
493 153(2), 363–369.
- 494 Burch, A. Y., Browne, P. J., Dunlap, C. A., Price, N. P., & Lindow, S. E. (2011). Comparison  
495 of biosurfactant detection methods reveals hydrophobic surfactants and  
496 contact-regulated production. *Environmental Microbiology*, 13(10), 2681–2691.
- 497 Burch, A. Y., Do, P. T., Sbodio, A., Suslow, T. V., & Lindow, S. E. (2016). High-level  
498 culturability of epiphytic bacteria and frequency of biosurfactant producers on leaves.  
499 *Applied and Environmental Microbiology*, 82(19), 5997–6009.
- 500 Burch, A. Y., Shimada, B. K., Browne, P. J., & Lindow, S. E. (2010). Novel high-throughput  
501 detection method to assess bacterial surfactant production. *Applied and Environmental*  
502 *Microbiology*, 76(16), 5363–5372.
- 503 Burch, A. Y., Zeisler, V., Yokota, K., Schreiber, L., & Lindow, S. E. (2014). The hygroscopic  
504 biosurfactant syringafactin produced by *Pseudomonas syringae* enhances fitness on  
505 leaf surfaces during fluctuating humidity. *Environmental Microbiology*, 16(7),  
506 2086–2098.
- 507 Buschhaus, C., & Jetter, R. (2011). Composition differences between epicuticular and  
508 intracuticular wax substructures: How do plants seal their epidermal surfaces? *Journal*  
509 *of Experimental Botany*, 62(3), 841–853.
- 510 Cabrefiga, J., Bonaterra, A., & Montesinos, E. (2007). Mechanisms of antagonism of  
511 *Pseudomonas fluorescens* EPS62e against *Erwinia amylovora*, the causal agent of fire  
512 blight. *International Microbiology: The Official Journal of the Spanish Society for*  
513 *Microbiology*, 10(2), 123–132.

- 514 D'aes, J., De Maeyer, K., Pauwelyn, E., & Höfte, M. (2010). Biosurfactants in  
515 plant-*Pseudomonas* interactions and their importance to biocontrol. *Environmental*  
516 *Microbiology Reports*, 2(3), 359–372.
- 517 De Bruijn, I., de Kock, M. J. D., de Waard, P., van Beek, T. A., & Raaijmakers, J. M. (2008).  
518 Massetolide A biosynthesis in *Pseudomonas fluorescens*. *Journal of Bacteriology*,  
519 190(8), 2777–2789.
- 520 De Bruijn, I., de Kock, M. J. D., Yang, M., de Waard, P., van Beek, T. A., & Raaijmakers, J.  
521 M. (2007). Genome-based discovery, structure prediction and functional analysis of  
522 cyclic lipopeptide antibiotics in *Pseudomonas* species. *Molecular Microbiology*, 63(2),  
523 417–428.
- 524 Freimoser, F. M., Pelludat, C., & Remus-Emsermann, M. N. P. (2016). Tritagonist as a new  
525 term for uncharacterised microorganisms in environmental systems. *The ISME Journal*,  
526 10(1), 1–3.
- 527 Geudens, N., & Martins, J. C. (2018). Cyclic lipodepsipeptides from *Pseudomonas* spp. -  
528 Biological Swiss-army knives. *Frontiers in Microbiology*, 9, 1867.
- 529 Glöckner, F. O., Yilmaz, P., Quast, C., Gerken, J., Beccati, A., Ciuprina, A., Bruns, G., Yarza,  
530 P., Peplies, J., Westram, R., & Ludwig, W. (2017). 25 years of serving the community  
531 with ribosomal RNA gene reference databases and tools. *Journal of Biotechnology*, 261,  
532 169–176.
- 533 Gomila, M., Peña, A., Mulet, M., Lalucat, J., & García-Valdés, E. (2015). Phylogenomics and  
534 systematics in *Pseudomonas*. *Frontiers in Microbiology*, 6, 214.
- 535 Graça, J. (2002). Glycerol and glyceryl esters of  $\omega$ -hydroxyacids in cutins. *Phytochemistry*,  
536 61(2), 205–215.
- 537 Hernandez, M. N., & Lindow, S. E. (2019). *Pseudomonas syringae* increases water  
538 availability in leaf microenvironments via production of hygroscopic syringafactin.  
539 *Applied and Environmental Microbiology*, 85(18). <https://doi.org/10.1128/AEM.01014-19>

- 540 Jeffree, C. E. (2006). The Fine Structure of the Plant Cuticle. In M. Riederer & C. Müller  
541 (Eds.), *Biology of the Plant Cuticle* (pp. 11–125). Blackwell Publishing Ltd.
- 542 Jetter, R., Kunst, L., & Samuels, A. L. (2006). Composition of Plant Cuticular Waxes. In M.  
543 Riederer & C. Müller (Eds.), *Biology of the Plant Cuticle* (pp. 145–181). Blackwell  
544 Publishing Ltd.
- 545 Kertesz, M. A., & Kawasaki, A. (2010). Hydrocarbon-Degrading Sphingomonads:  
546 *Sphingomonas*, *Sphingobium*, *Novosphingobium*, and *Sphingopyxis*. In K. N. Timmis  
547 (Ed.), *Handbook of Hydrocarbon and Lipid Microbiology* (pp. 1693–1705). Springer  
548 Berlin Heidelberg.
- 549 Kolattukudy, P. E. (1980). Biopolyester membranes of plants: cutin and suberin. *Science*,  
550 208(4447), 990–1000.
- 551 Laycock, M. V., Hildebrand, P. D., Thibault, P., Walter, J. A., & Wright, J. L. C. (1991).  
552 Viscosin, a potent peptidolipid biosurfactant and phytopathogenic mediator produced by  
553 a pectolytic strain of *Pseudomonas fluorescens*. *Journal of Agricultural and Food*  
554 *Chemistry*, 39(3), 483–489.
- 555 Lemoine, F., Correia, D., Lefort, V., Doppelt-Azeroual, O., Mareuil, F., Cohen-Boulakia, S., &  
556 Gascuel, O. (2019). NGPhylogeny.fr: new generation phylogenetic services for  
557 non-specialists. *Nucleic Acids Research*, 47(W1), W260–W265.
- 558 Letunic, I., & Bork, P. (2019). Interactive Tree Of Life (iTOL) v4: recent updates and new  
559 developments. *Nucleic Acids Research*, 47(W1), W256–W259.
- 560 Lindow, S. E., & Brandl, M. T. (2003). Microbiology of the phyllosphere. *Applied and*  
561 *Environmental Microbiology*, 69(4), 1875–1883.
- 562 Lyons, N. A., & Kolter, R. (2017). *Bacillus subtilis* protects public goods by extending kin  
563 discrimination to closely related species. *mBio*, 8(4).  
564 <https://doi.org/10.1128/mBio.00723-17>
- 565 Miebach, M., Schlechter, R. O., Clemens, J., Jameson, P. E., & Remus-Emsermann, M. N.

- 566 P. (2020). Litterbox-A gnotobiotic Zeolite-Clay System to Investigate  
567 *Arabidopsis*-Microbe Interactions. *Microorganisms*, 8(4), 464.
- 568 Newcombe, H. B., & Hawirko, R. (1949). Spontaneous mutation to streptomycin resistance  
569 and dependence in *Escherichia coli*. *Journal of Bacteriology*, 57(5), 565–572.
- 570 Nybroe, O., & Sørensen, J. (2004). Production of cyclic lipopeptides by fluorescent  
571 *Pseudomonads*. In J.-L. Ramos (Ed.), *Pseudomonas: Volume 3 Biosynthesis of*  
572 *Macromolecules and Molecular Metabolism* (pp. 147–172). Springer US.
- 573 Oso, S., Walters, M., Schlechter, R. O., & Remus-Emsermann, M. N. P. (2019). Utilisation of  
574 hydrocarbons and production of surfactants by bacteria isolated from plant leaf  
575 surfaces. *FEMS Microbiology Letters*, 366(6), fnz061.
- 576 Peix, A., Ramírez-Bahena, M.-H., & Velázquez, E. (2018). The current status on the  
577 taxonomy of *Pseudomonas* revisited: An update. *Infection, Genetics and Evolution:*  
578 *Journal of Molecular Epidemiology and Evolutionary Genetics in Infectious Diseases*,  
579 57, 106–116.
- 580 Pizzolante, G., Durante, M., Rizzo, D., Di Salvo, M., Tredici, S. M., Tufariello, M., De Paolis,  
581 A., Talà, A., Mita, G., Alifano, P., & De Benedetto, G. E. (2018). Characterization of two  
582 *Pantoea* strains isolated from extra-virgin olive oil. *AMB Express*, 8(1), 113.
- 583 Pollard, M., Beisson, F., Li, Y., & Ohlrogge, J. B. (2008). Building lipid barriers: biosynthesis  
584 of cutin and suberin. *Trends in Plant Science*, 13(5), 236–246.
- 585 Remus-Emsermann, M. N. P., Lückner, S., Müller, D. B., Potthoff, E., Daims, H., & Vorholt, J.  
586 A. (2014). Spatial distribution analyses of natural phyllosphere-colonizing bacteria on  
587 *Arabidopsis thaliana* revealed by fluorescence *in situ* hybridization. *Environmental*  
588 *Microbiology*, 16(7), 2329–2340.
- 589 Remus-Emsermann, M. N. P., Schmid, M., Gekenidis, M.-T., Pelludat, C., Frey, J. E., Ahrens,  
590 C. H., & Drissner, D. (2016). Complete genome sequence of *Pseudomonas citronellolis*  
591 P3B5, a candidate for microbial phyllo-remediation of hydrocarbon-contaminated sites.

- 592        *Standards in Genomic Sciences*, 11, 75.
- 593 Riederer, M., & Schreiber, L. (2001). Protecting against water loss: analysis of the barrier  
594        properties of plant cuticles. *Journal of Experimental Botany*, 52(363), 2023–2032.
- 595 Salam, L. B., Obayori, O. S., & Raji, S. A. (2015). Biodegradation of used engine oil by a  
596        methylotrophic bacterium, *Methylobacterium mesophilicum* isolated from tropical  
597        hydrocarbon-contaminated soil. *Petroleum Science and Technology*, 33(2), 186–195.
- 598 Samuels, L., Kunst, L., & Jetter, R. (2008). Sealing plant surfaces: Cuticular wax formation  
599        by epidermal cells. *Annual Review of Plant Biology*, 59(1), 683–707.
- 600 Schlechter, R. O., Miebach, M., & Remus-Emsermann, M. N. P. (2019). Driving factors of  
601        epiphytic bacterial communities: A review. *Journal of Advertising Research*, 19, 57–65.
- 602 Schmid, M., Frei, D., Patrignani, A., Schlapbach, R., Frey, J. E., Remus-Emsermann, M. N.  
603        P., & Ahrens, C. H. (2018). Pushing the limits of de novo genome assembly for complex  
604        prokaryotic genomes harboring very long, near identical repeats. *Nucleic Acids*  
605        *Research*, 46(17), 8953–8965.
- 606 Serrano, M., Coluccia, F., Torres, M., L'Haridon, F., & Métraux, J.-P. (2014). The cuticle and  
607        plant defense to pathogens. *Frontiers in Plant Science*, 5.  
608        <https://doi.org/10.3389/fpls.2014.00274>
- 609 Shepherd, T., & Wynne Griffiths, D. (2006). The effects of stress on plant cuticular waxes.  
610        *The New Phytologist*, 171(3), 469–499.
- 611 Silby, M. W., Cerdeño-Tárraga, A. M., Vernikos, G. S., Giddens, S. R., Jackson, R. W.,  
612        Preston, G. M., Zhang, X.-X., Moon, C. D., Gehrig, S. M., Godfrey, S. A. C., Knight, C.  
613        G., Malone, J. G., Robinson, Z., Spiers, A. J., Harris, S., Challis, G. L., Yaxley, A. M.,  
614        Harris, D., Seeger, K., ... Thomson, N. R. (2009). Genomic and genetic analyses of  
615        diversity and plant interactions of *Pseudomonas fluorescens*. *Genome Biology*, 10(5),  
616        R51.
- 617 Wante, S. P., & Leung, D. W. M. (2018). Phytotoxicity testing of diesel-contaminated water

618 using *Petunia grandiflora* Juss. Mix F1 and Marigold-Nemo Mix (*Tagetes patula* L.).  
619 *Environmental Monitoring and Assessment*, 190(7), 408.

620 Wattendorff, J., & Holloway, P. J. (1980). Studies on the Ultrastructure and Histochemistry of  
621 Plant Cuticles: The Cuticular Membrane of *Agave americana* L. in situ. *Annals of*  
622 *Botany*, 46(1), 13–28.

623 Xin, X.-F., Kvitko, B., & He, S. Y. (2018). *Pseudomonas syringae*: what it takes to be a  
624 pathogen. *Nature Reviews. Microbiology*, 16(5), 316–328.

625 Yeats, T. H., Buda, G. J., Wang, Z., Chehanovsky, N., Moyle, L. C., Jetter, R., Schaffer, A. A.,  
626 & Rose, J. K. C. (2012). The fruit cuticles of wild tomato species exhibit architectural  
627 and chemical diversity, providing a new model for studying the evolution of cuticle  
628 function. *The Plant Journal*, 69(4), 655–666.

629 Yoon, S.-H., Ha, S.-M., Kwon, S., Lim, J., Kim, Y., Seo, H., & Chun, J. (2017). Introducing  
630 EzBioCloud: a taxonomically united database of 16S rRNA gene sequences and  
631 whole-genome assemblies. *International Journal of Systematic and Evolutionary*  
632 *Microbiology*, 67(5), 1613–1617.

633 Zeisler-Diehl, V. V., Barthlott, W., & Schreiber, L. (2018). Plant Cuticular Waxes:  
634 Composition, Function, and Interactions with Microorganisms. In H. Wilkes (Ed.),  
635 *Hydrocarbons, Oils and Lipids: Diversity, Origin, Chemistry and Fate* (pp. 1–16).  
636 Springer International Publishing.

637 Zengerer, V., Schmid, M., Bieri, M., Müller, D. C., Remus-Emsermann, M. N. P., Ahrens, C.  
638 H., & Pelludat, C. (2018). *Pseudomonas orientalis* F9: A potent antagonist against  
639 phytopathogens with phytotoxic effect in the apple flower. *Frontiers in Microbiology*, 9,  
640 145.

641
